# Supplementary material for: Defect- and oxygen-rich nanocarbon derived from solution plasma for bifunctional catalytic activity of oxygen reduction and evolution reactions
Source: Royal Society of Chemistry journal article supplement (doi:10.1039/d3ra05164a), 2023-01-01
Supplement: d3ra05164a1.pdf [file d3ra05164a1.pdf]

## **Supplementary Information**

# **Defect and oxygen-rich nanocarbon derived from solution plasma for bifunctional catalytic activity of oxygen reduction and evolution reactions**

Hye-min Kim,<sup>a</sup> Byung-chul Cha<sup>b</sup> and Dae-wook Kim<sup>\*b</sup>

<sup>a</sup> Department of Materials Chemistry, Shinshu University, 4-17-1, Wakasato, Nagano, 3808553, Japan

<sup>b</sup> Advanced Manufacturing Process R&D Group, Ulsan Regional Division, Korea Institute of Industrial Technology (KITECH), 55, Jongga-ro, Jung-gu, Ulsan, 44313, Korea

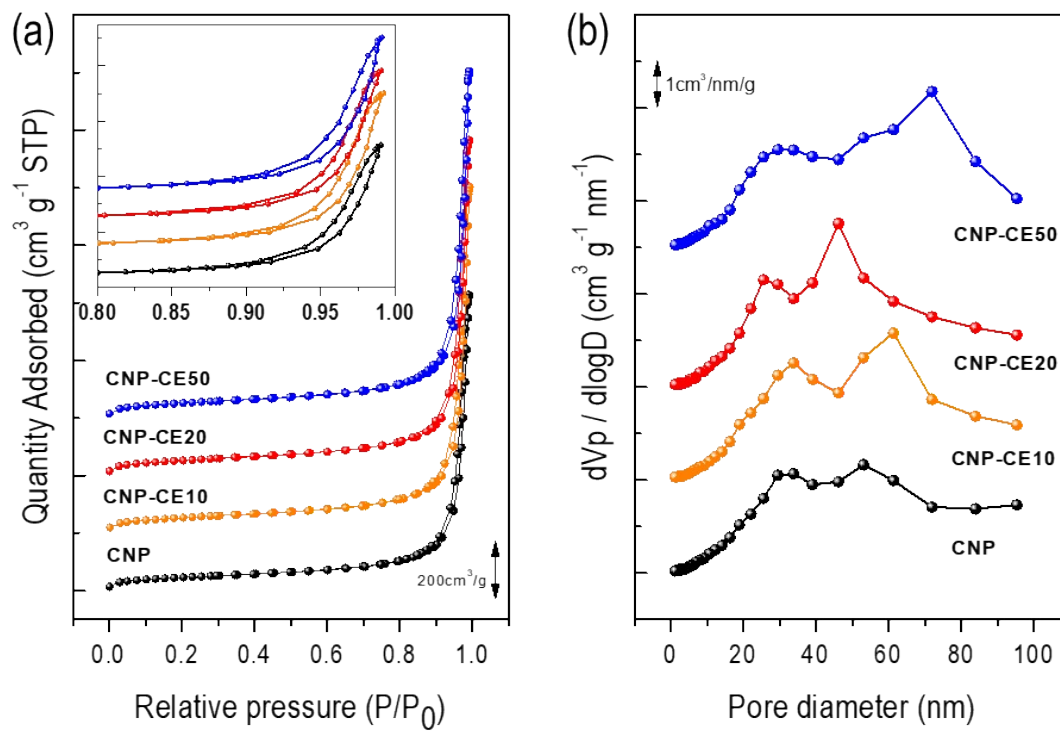

**Fig. S1.** (a)  $N_2$  adsorption/desorption isotherms and (b) pore size distributions of CNP and CNP-CEs.

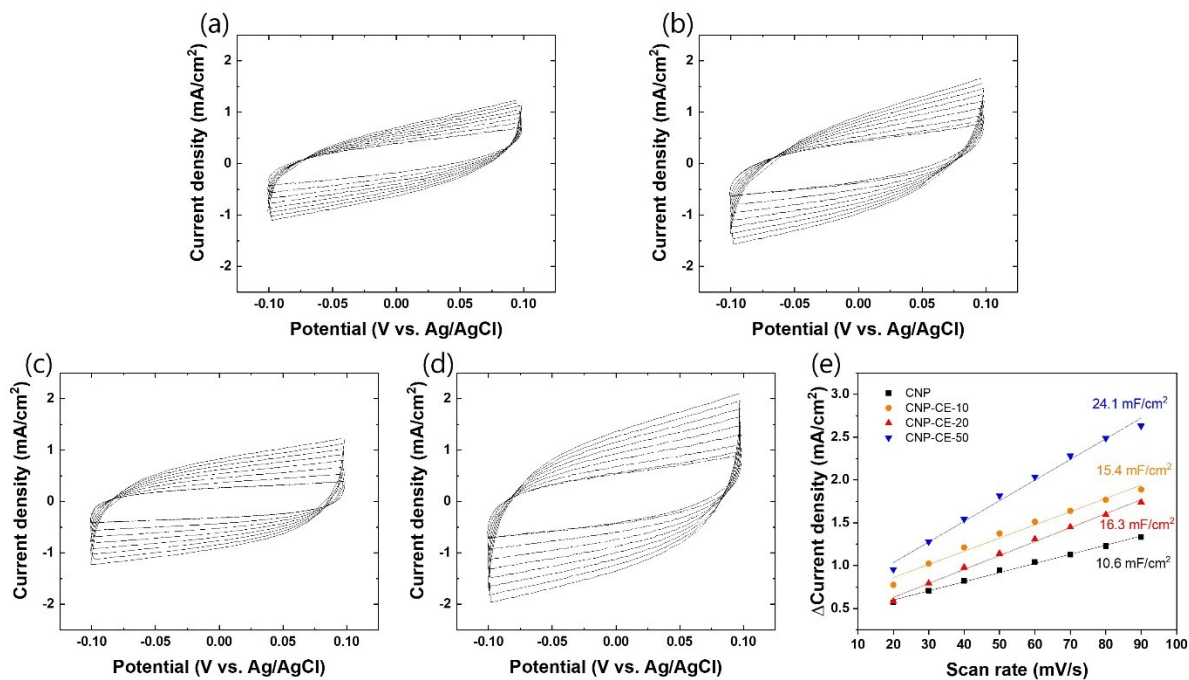

**Fig. S2.** CV curves of CNP and CNP-CEs in the non-faradaic region for (a) CNP, (b) CNP-CE-10, (c) CNP-CE-20, (d) CNP-CE-50 at scan rate of 20~90 mV/s in the 0.1 M KOH. (e) linear regression between the current density at the various scan rate in the half potential of CV curves for estimation electrochemical active surface areas.

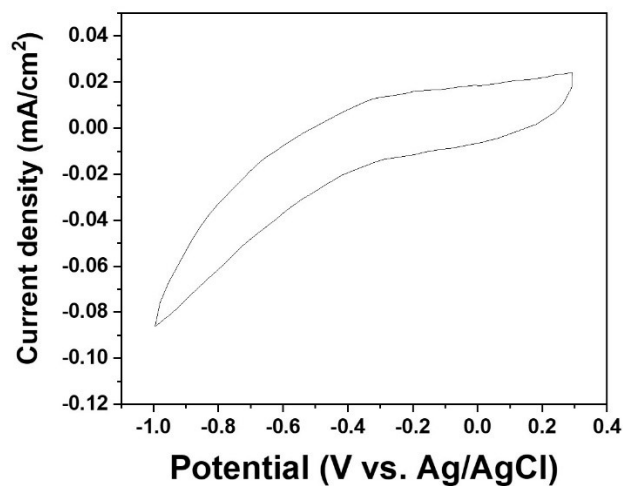

**Fig. S3.** CV curve of dicyclohexano-18-crown-6 ether.

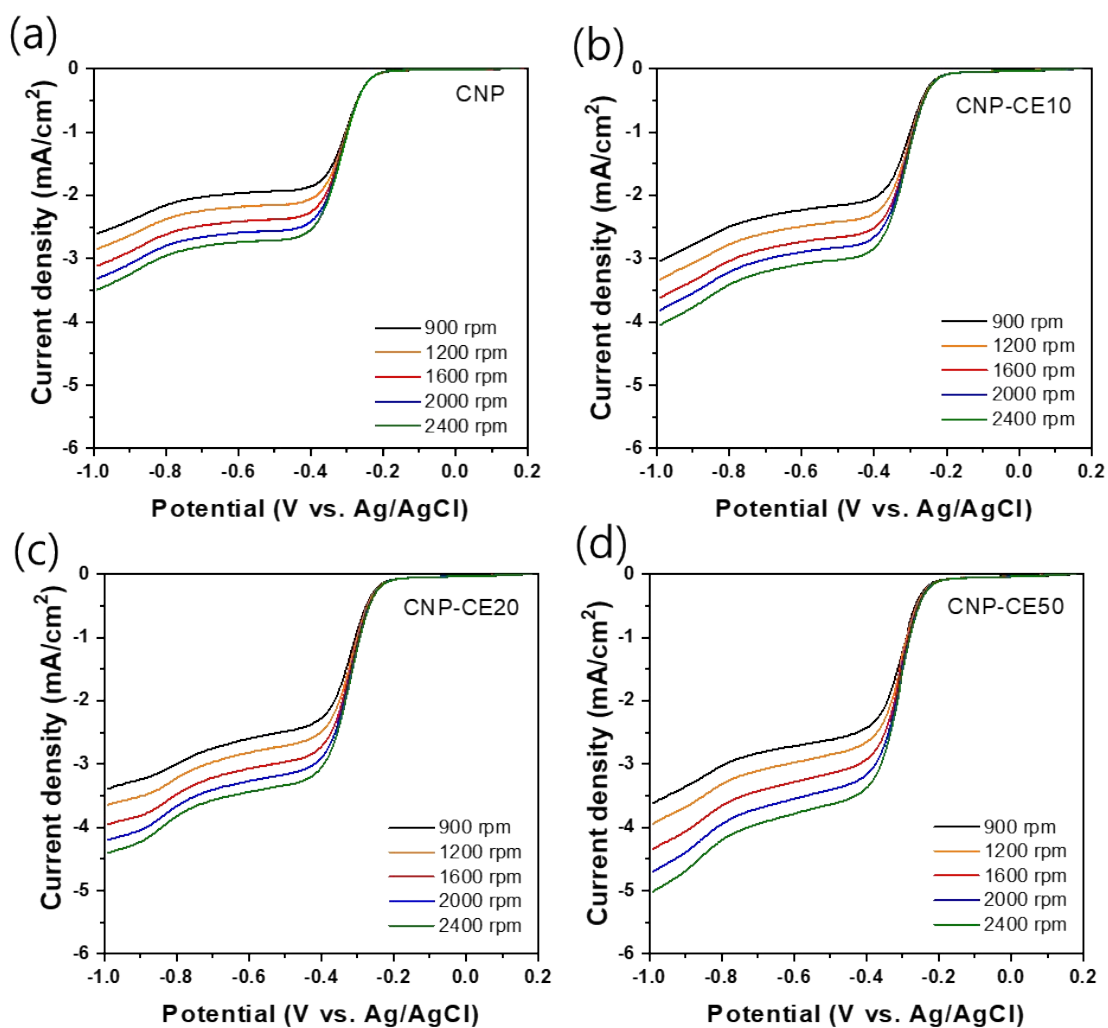

**Fig. S4.** Linear sweep voltammograms of CNP and CNP-CEs for (a) CNP, (b) CNP-CE-10, (c) CNP-CE-20, and (d) CNP-CE-50 at a scan rate of 10 mV/s in the O<sub>2</sub> saturated 0.1 M KOH.

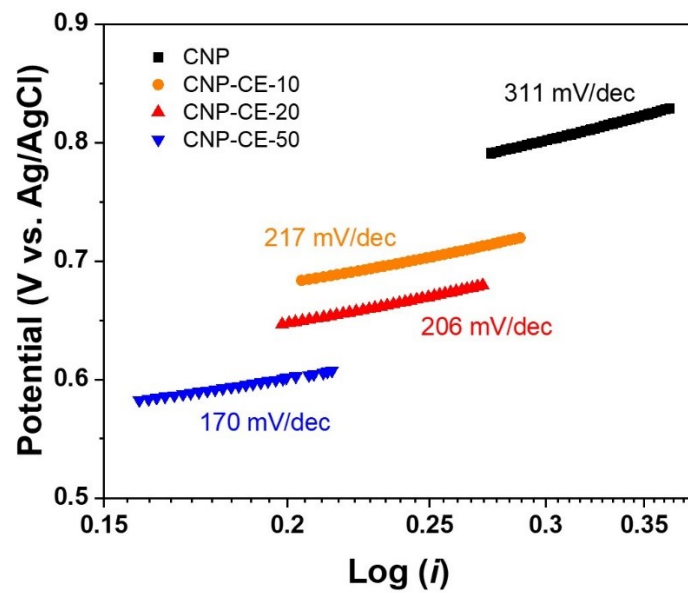

Fig. S5. Tafel slope of CNP and CNP-CEs in the  $\text{O}_2$  saturated 0.1 M KOH for OER.
